# Supplementary material for: Pinched flow fractionation devices for detection of single nucleotide polymorphisms
Source: Royal Society of Chemistry journal article supplement (doi:10.1039/b802268b), 2008-01-01
Supplement: b802268b.pdf [file b802268b.pdf]

**Table S1** DNA oligonucleotide probes, targets and primers

| <b>Oligonucleotide</b> | <b>Sequence</b>                                                      |
|------------------------|----------------------------------------------------------------------|
| Wt probe               | 5'-Biotin-TTTTTTTTTTTTTTTTTTTT GGAGAAGTCTGCC-3'                      |
| Mt probe               | 5'-Biotin-TTTTTTTTTTTTTTTTTTTT GAGAAGGTCTGCC-3'                      |
| Wt target              | 5'-Cy5-CAGGGCAGTAACGGCAGACTTCTCCTCAGGAGTCAGATGCAC-3'                 |
| Mt target              | 5'-Cy5-CAGGGCAGTAACGGCAGACCTTCTCCTCAGGAGTCAGATGCA-3'                 |
| BCF                    | 5'-AGCAGGGAGGGCAGGAGCCA-3'                                           |
| T7-BCR                 | 5'- <b>GAAATTAATACGACTCACTATAGGG</b> GAGAAGAGTCAGTGCCTATCAGAAACCC-3' |
| BCR                    | 5'-AGAGTCAGTGCCTATCAGAAACCC-3'                                       |

T7 promoter sequence is denoted in bold.
